# Supplementary material for: Facile preparation of ordered arrays of polystyrene spheres dissymmetrically decorated with gold nanoparticles at air/liquid interface and their SERS properties
Source: Royal Society of Chemistry journal article supplement (doi:10.1039/c2ra01301k), 2012-01-01
Supplement: c2ra01301k.pdf [file c2ra01301k.pdf]

## Supporting Information

### Facile preparation of ordered arrays of polystyrene spheres dissymmetrically decorated with gold nanoparticles at air/liquid interface and their SERS properties

Yue Xia,<sup>a</sup> Yingchang Yang,<sup>a</sup> Jufang Zheng,<sup>b</sup> Wei Huang<sup>a</sup> and Zelin Li<sup>\*a</sup>

<sup>a</sup>Key Laboratory of Chemical Biology and Traditional Chinese Medicine Research (Ministry of Education of China), College of Chemistry and Chemical Engineering, Hunan Normal University, Lushan Road, Changsha, 410081, China

<sup>b</sup>Key Laboratory of the Ministry of Education for Advanced Catalysis Materials, Institute of Physical Chemistry, Zhejiang Normal University, Jinhua, 321004, China

**Table S1.** Synthesis conditions of PS/Au, PS/Pd and PS/Au-Pd composite particles

| dielectric-metal composites | SnSO <sub>4</sub> [24 mM] | PdCl <sub>2</sub> [2 mM] | HAuCl <sub>4</sub> [2.4 mM] | HCl [2 M] | Pd/Au mol ratio <sup>a</sup> | Heating time <sup>b</sup> |
|-----------------------------|---------------------------|--------------------------|-----------------------------|-----------|------------------------------|---------------------------|
| PS/Au                       | 4 ml                      | /                        | 4 ml                        | 4 ml      | /                            | 10 to 40 min              |
| PS/Pd                       | 4 ml                      | 4 ml                     | /                           | 4 ml      | /                            | 5 h                       |
| PS/Au-Pd(a1)                | 4 ml                      | 1 ml                     | 3 ml                        | 4 ml      | 1/3.6                        | 1.5 h                     |
| PS/Au-Pd(a2)                | 4 ml                      | 2 ml                     | 2 ml                        | 4 ml      | 1/1.2                        | 3 h                       |

<sup>a</sup> In precursor solutions, <sup>b</sup> at 60 °C.

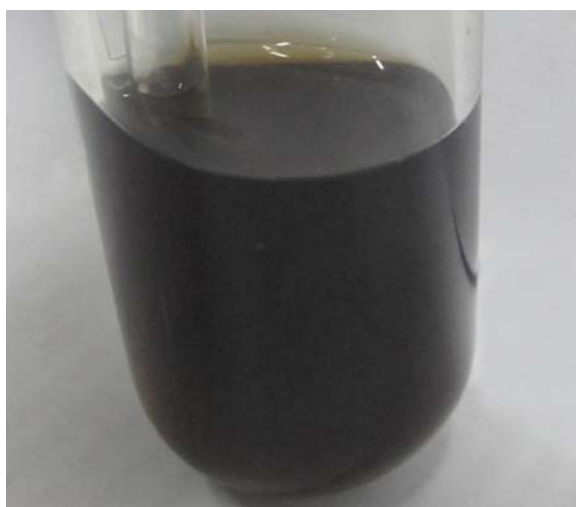

**Fig. S1** An optical photograph of Au colloid after heating at 60°C for 40 min under protection of N<sub>2</sub> gas.

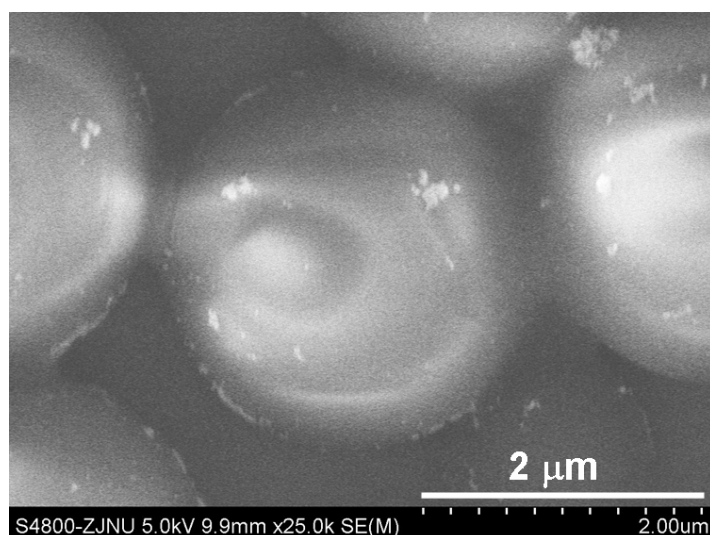

**Fig. S2** A SEM image of PS spheres floating on the surface of citrate-reduced Au colloid under formic acid vapor for 6 h at room temperature ( $\sim 20^\circ\text{C}$ ).

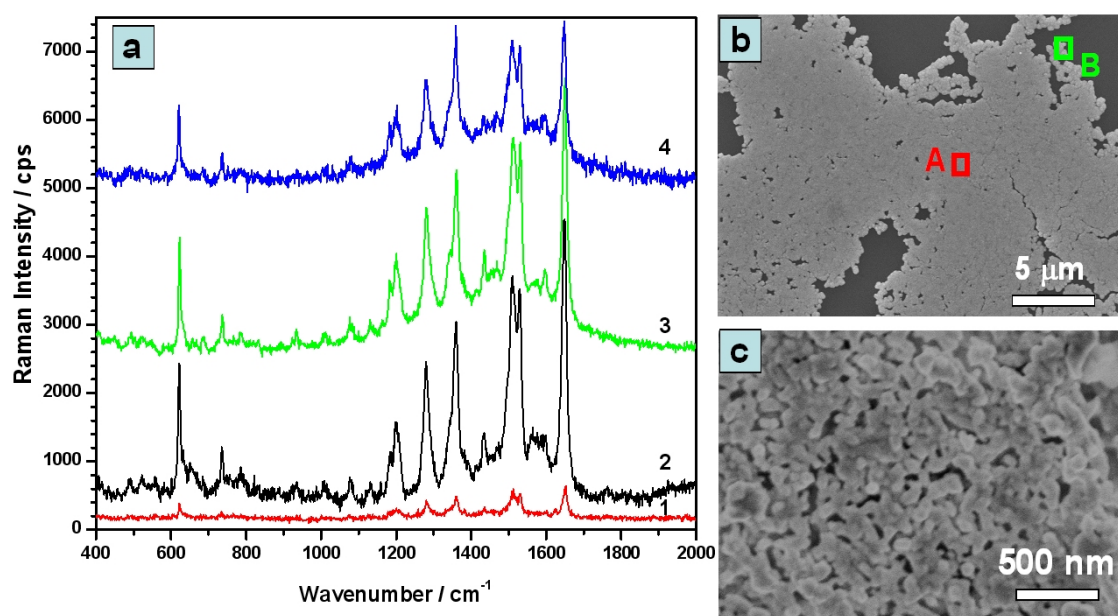

**Fig. S3** (a) SERS spectra of RdB on the aggregated Au NPs on a flat Si substrate (spectra (1) and (3)), on the PS/Au (12 h) composite particle array (spectrum (2), which was extracted from Fig. 7c), and on a rough Au electrode prepared by electrochemical ORC method (spectrum (4)). SEM images of (b) aggregated Au NPs on Si substrate and (c) Au electrode roughened by electrochemical ORC method. Region A corresponds to spectrum (1) and Region B corresponds to spectrum (3).
